# Supplementary material for: Superiority of Organic Calcium Fertilizers over Inorganic Counterparts in Enhancing Fruit Firmness and Quality of Blue Honeysuckle (Lonicera caerulea L.)
Source: MDPI journal article supplement (doi:10.3390/foods15111856), 2026-05-24
Supplement: s1 [file foods-4249202-supplementary.pdf › foods-4249202-supplementary.pdf]

## Supplementary Materials

**Table S1.** Weight loss rate of blue honeysuckle under room temperature and 4°C in 2025.

| Treatment  | Weight loss rate (%) |              |
|------------|----------------------|--------------|
|            | Room temperature     | 4°C          |
| Control    | 63.22±0.12Aa         | 10.56±0.5Aa  |
| CaC 0.5g/L | 27.66±0.19Dc         | 10.04±0.07Aa |
| CaC 1.0g/L | 26.94±0.06Dd         | 5.34±0.15Bc  |
| CaC 2.0g/L | 30.87±0.06Eb         | 7.77±0.17Ab  |
| CaA 0.5g/L | 49.46±0.25Ab         | 8.74±0.89Bb  |
| CaA 1.0g/L | 45.90±0.22Ad         | 7.92±0.12Abc |
| CaA 2.0g/L | 47.34±0.22Ac         | 7.26±0.20Ac  |
| CaL 0.5g/L | 42.16±0.23Bb         | 8.19±0.54BCd |
| CaL 1.0g/L | 29.54±0.23Cd         | 4.57±0.35Cc  |
| CaL 2.0g/L | 34.81±1.50Dc         | 5.43±0.33Bc  |
| SAC 0.5g/L | 34.56±0.84Cb         | 4.87±0.24Db  |
| SAC 1.0g/L | 26.42±0.13Ec         | 4.47±0.17Cb  |
| SAC 2.0g/L | 36.26±0.08Cb         | 5.09±1.41Bb  |
| AAC 0.5g/L | 27.81±0.20Dd         | 7.30±0.48Cb  |
| AAC 1.0g/L | 37.38±0.24Bc         | 4.88±0.56BCc |
| AAC 2.0g/L | 44.21±0.65Bb         | 6.94±0.30Ab  |

In the table, the control represents spraying with water; CaC represents calcium chloride; CaA represents calcium acetate; CaL represents calcium lactate; SAC represents sugar alcohol calcium; AAC represents amino acid calcium. Data are presented as mean ± standard deviation. Different lowercase letters indicate significant differences among different concentrations of the same calcium fertilizer treatment; different uppercase letters indicate significant differences among different calcium fertilizer treatments at the same concentration ( $P < 0.05$ ).

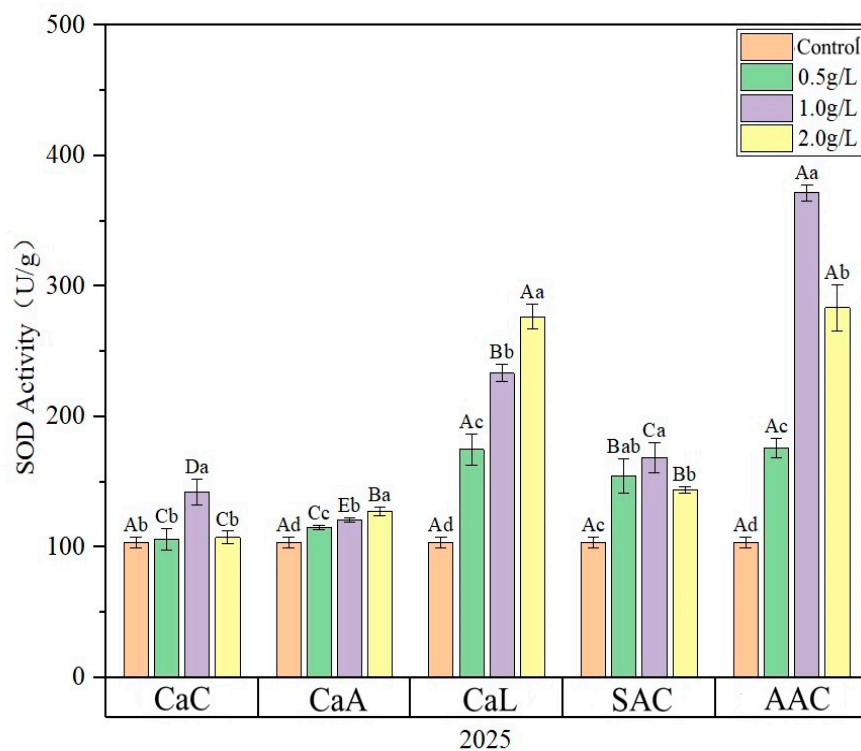

**Figure S1.** Effects of spraying different forms of calcium fertilizers on the SOD activity of blue honeysuckle fruit in 2025. In the figure, the control represents spraying with water; CaC represents calcium chloride; CaA represents calcium acetate; CaL represents calcium lactate; SAC represents sugar alcohol calcium; AAC represents amino acid calcium. Data are presented as mean  $\pm$  standard deviation. Different lowercase letters indicate significant differences among different concentrations of the same calcium fertilizer treatment; different uppercase letters indicate significant differences among different calcium fertilizer treatments at the same concentration ( $P < 0.05$ ).

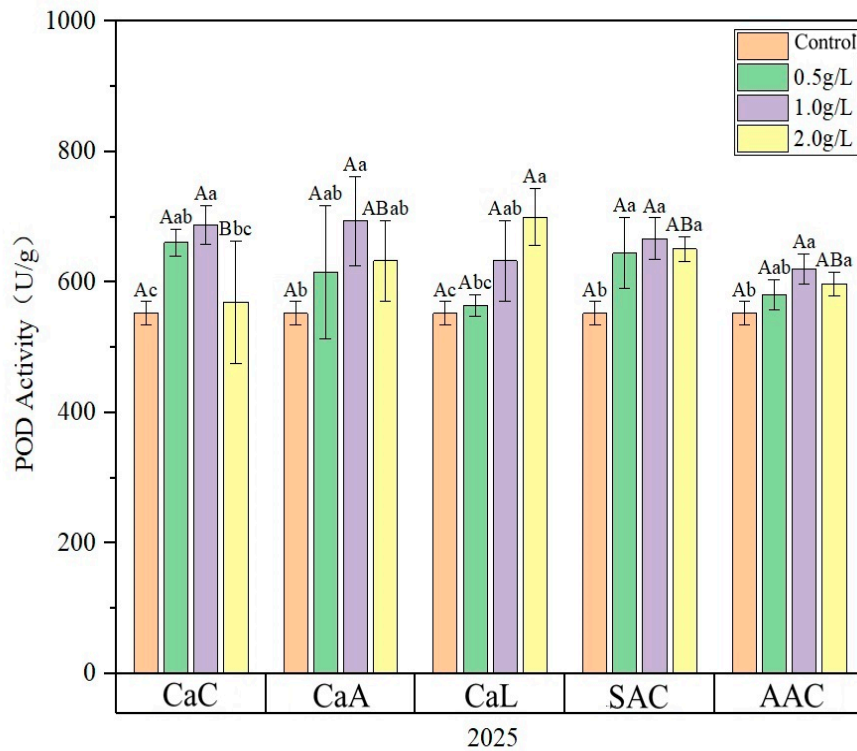

**Figure S2.** Effects of spraying different forms of calcium fertilizers on the POD activity of blue honeysuckle fruit in 2025. In the figure, the control represents spraying with water; CaC represents calcium chloride; CaA represents calcium acetate; CaL represents calcium lactate; SAC represents sugar alcohol calcium; AAC represents amino acid calcium. Data are presented as mean  $\pm$  standard deviation. Different lowercase letters indicate significant differences among different concentrations of the same calcium fertilizer treatment; different uppercase letters indicate significant differences among different calcium fertilizer treatments at the same concentration ( $P < 0.05$ ).

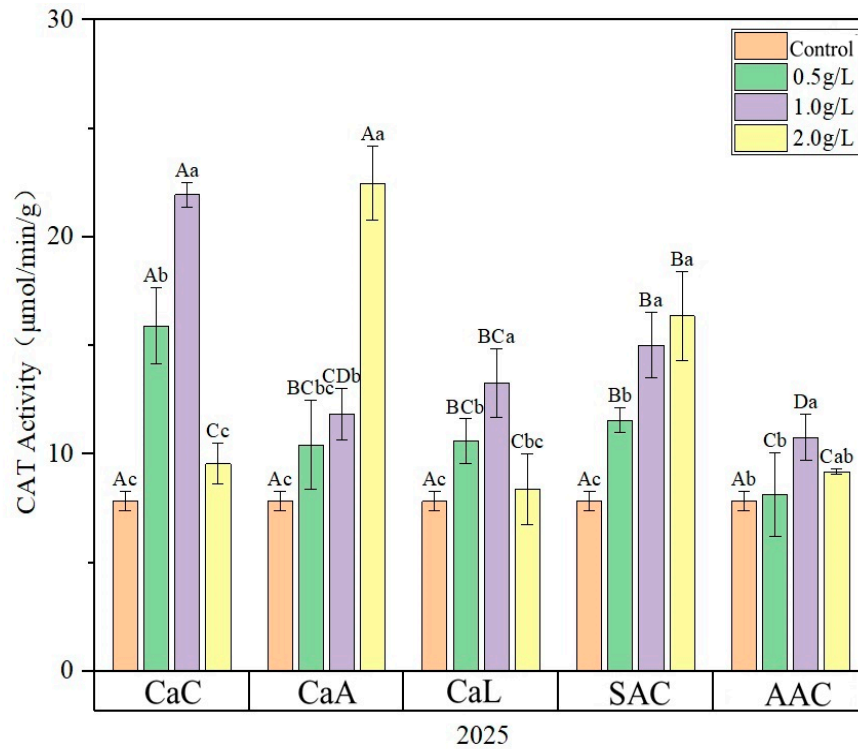

**Figure S3.** Effects of spraying different forms of calcium fertilizers on the CAT activity of blue honeysuckle fruit in 2025. In the figure, the control represents spraying with water; CaC represents calcium chloride; CaA represents calcium acetate; CaL represents calcium lactate; SAC represents sugar alcohol calcium; AAC represents amino acid calcium. Data are presented as mean  $\pm$  standard deviation. Different lowercase letters indicate significant differences among different concentrations of the same calcium fertilizer treatment; different uppercase letters indicate significant differences among different calcium fertilizer treatments at the same concentration ( $P < 0.05$ ).

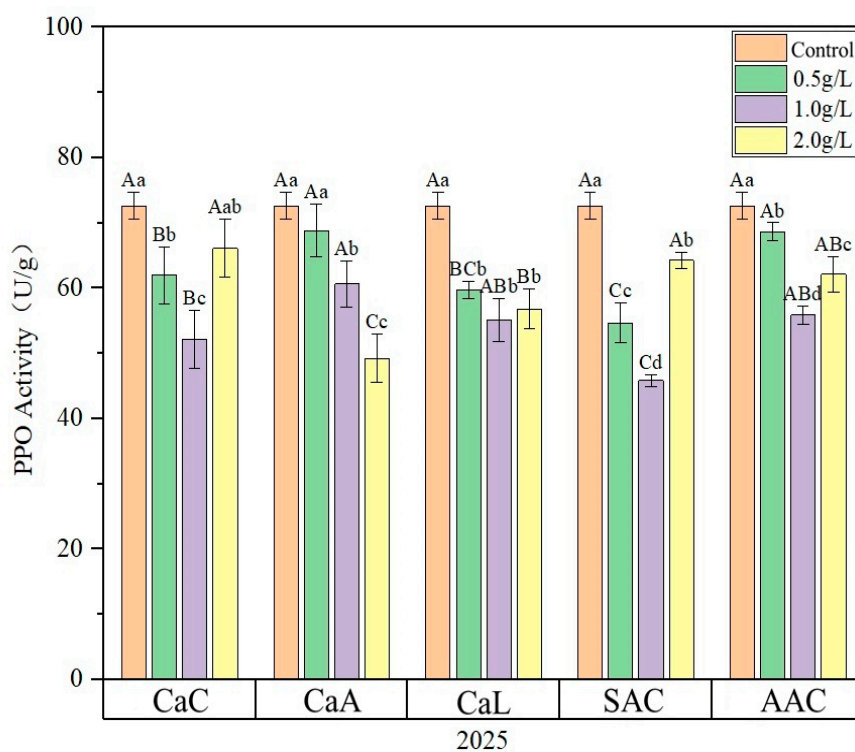

**Figure S4.** Effects of spraying different forms of calcium fertilizers on the PPO activity of blue honeysuckle fruit in 2025. In the figure, the control represents spraying with water; CaC represents calcium chloride; CaA represents calcium acetate; CaL represents calcium lactate; SAC represents sugar alcohol calcium; AAC represents amino acid calcium. Data are presented as mean  $\pm$  standard deviation. Different lowercase letters indicate significant differences among different concentrations of the same calcium fertilizer treatment; different uppercase letters indicate significant differences among different calcium fertilizer treatments at the same concentration ( $P < 0.05$ ).

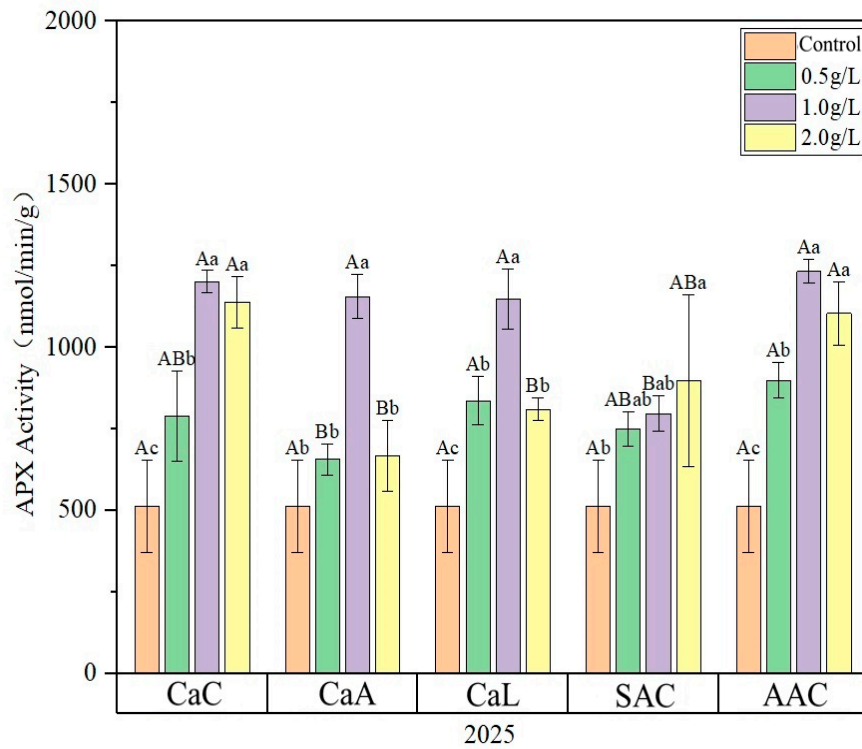

**Figure S5.** Effects of spraying different forms of calcium fertilizers on the APX activity of blue honeysuckle fruit in 2025. In the figure, the control represents spraying with water; CaC represents calcium chloride; CaA represents calcium acetate; CaL represents calcium lactate; SAC represents sugar alcohol calcium; AAC represents amino acid calcium. Data are presented as mean  $\pm$  standard deviation. Different lowercase letters indicate significant differences among different concentrations of the same calcium fertilizer treatment; different uppercase letters indicate significant differences among different calcium fertilizer treatments at the same concentration ( $P < 0.05$ ).

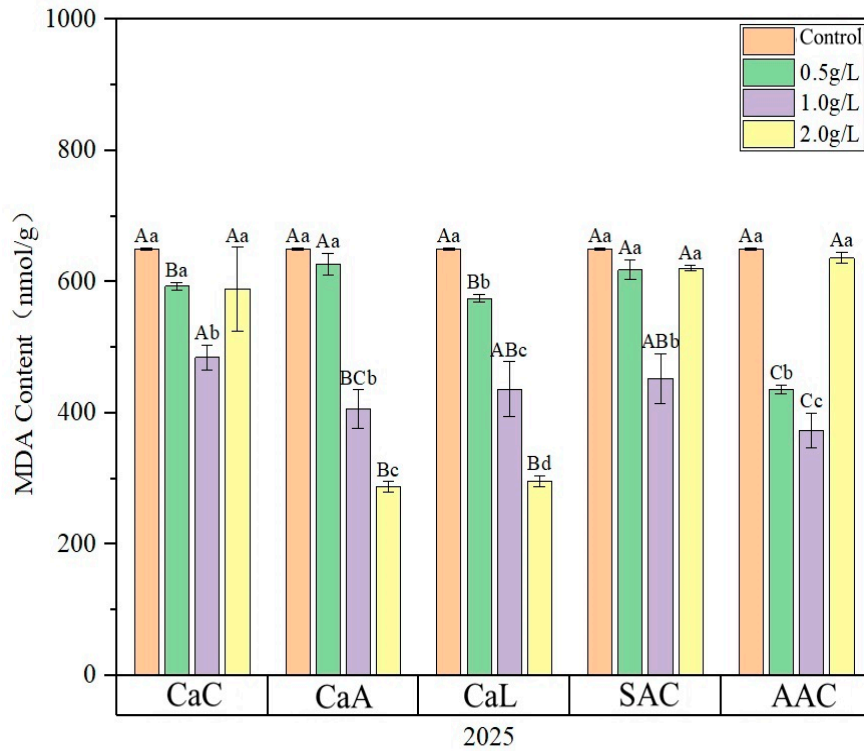

**Figure S6.** Effects of spraying different forms of calcium fertilizers on the MDA content of blue honeysuckle fruit in 2025. In the figure, the control represents spraying with water; CaC represents calcium chloride; CaA represents calcium acetate; CaL represents calcium lactate; SAC represents sugar alcohol calcium; AAC represents amino acid calcium. Data are presented as mean  $\pm$  standard deviation. Different lowercase letters indicate significant differences among different concentrations of the same calcium fertilizer treatment; different uppercase letters indicate significant differences among different calcium fertilizer treatments at the same concentration ( $P < 0.05$ ).

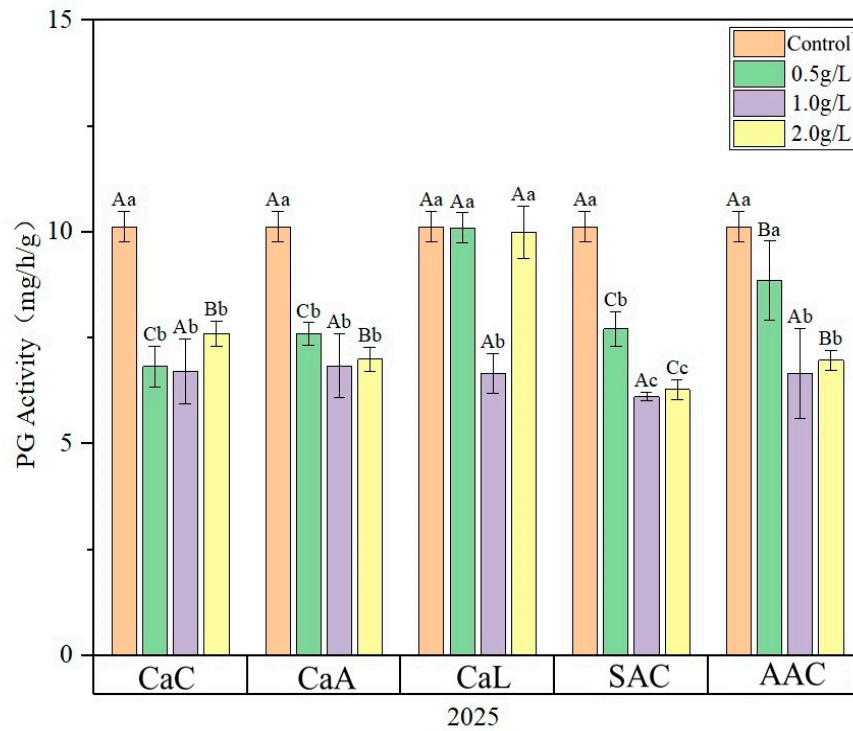

**Figure S7.** Effects of spraying different forms of calcium fertilizers on the PG activity of blue honeysuckle fruit in 2025. In the figure, the control represents spraying with water; CaC represents calcium chloride; CaA represents calcium acetate; CaL represents calcium lactate; SAC represents sugar alcohol calcium; AAC represents amino acid calcium. Data are presented as mean  $\pm$  standard deviation. Different lowercase letters indicate significant differences among different concentrations of the same calcium fertilizer treatment; different uppercase letters indicate significant differences among different calcium fertilizer treatments at the same concentration ( $P < 0.05$ ).



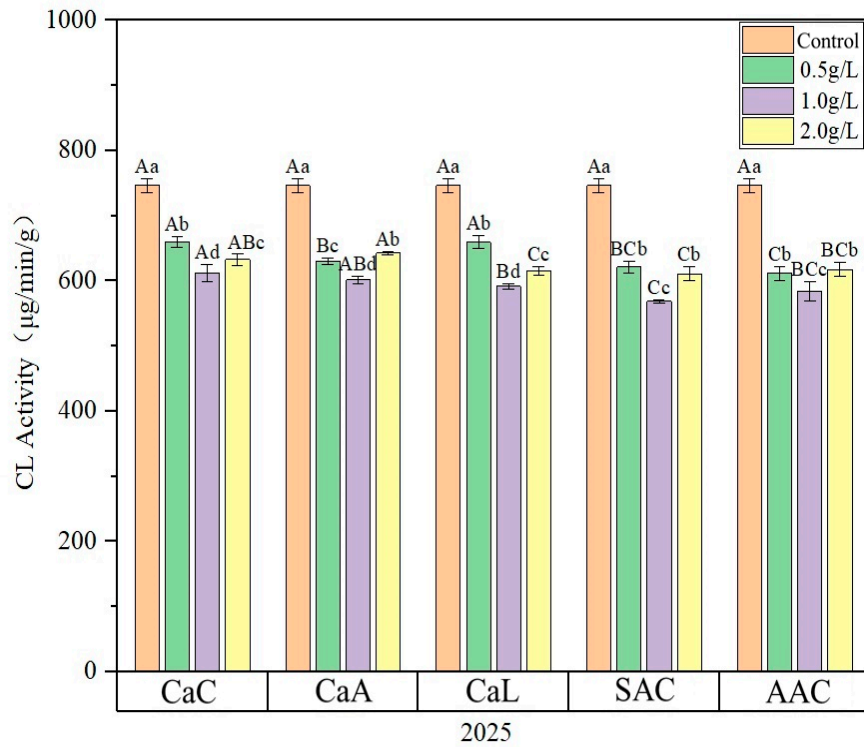

**Figure S8.** Effects of spraying different forms of calcium fertilizers on the CL activity of blue honeysuckle fruit in 2025. In the figure, the control represents spraying with water; CaC represents calcium chloride; CaA represents calcium acetate; CaL represents calcium lactate; SAC represents sugar alcohol calcium; AAC represents amino acid calcium. Data are presented as mean  $\pm$  standard deviation. Different lowercase letters indicate significant differences among different concentrations of the same calcium fertilizer treatment; different uppercase letters indicate significant differences among different calcium fertilizer treatments at the same concentration ( $P < 0.05$ ).

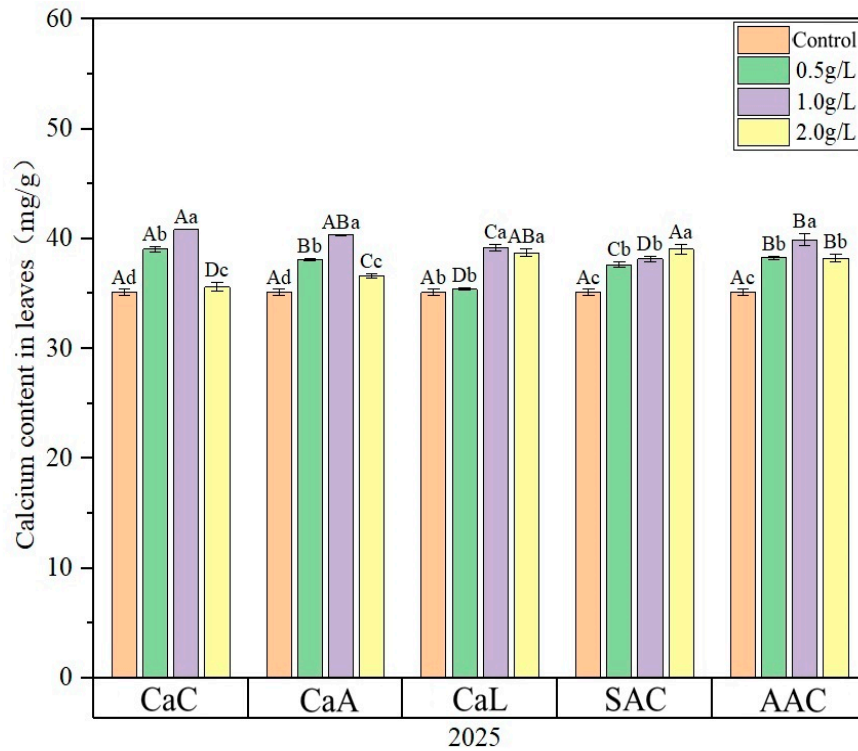

**Figure S9.** Effects of spraying different forms of calcium fertilizers on the calcium content in blue honeysuckle leaves in 2025. In the figure, the control represents spraying with water; CaC represents calcium chloride; CaA represents calcium acetate; CaL represents calcium lactate; SAC represents sugar alcohol calcium; AAC represents amino acid calcium. Data are presented as mean  $\pm$  standard deviation. Different lowercase letters indicate significant differences among different concentrations of the same calcium fertilizer treatment; different uppercase letters indicate significant differences among different calcium fertilizer treatments at the same concentration ( $P < 0.05$ ).

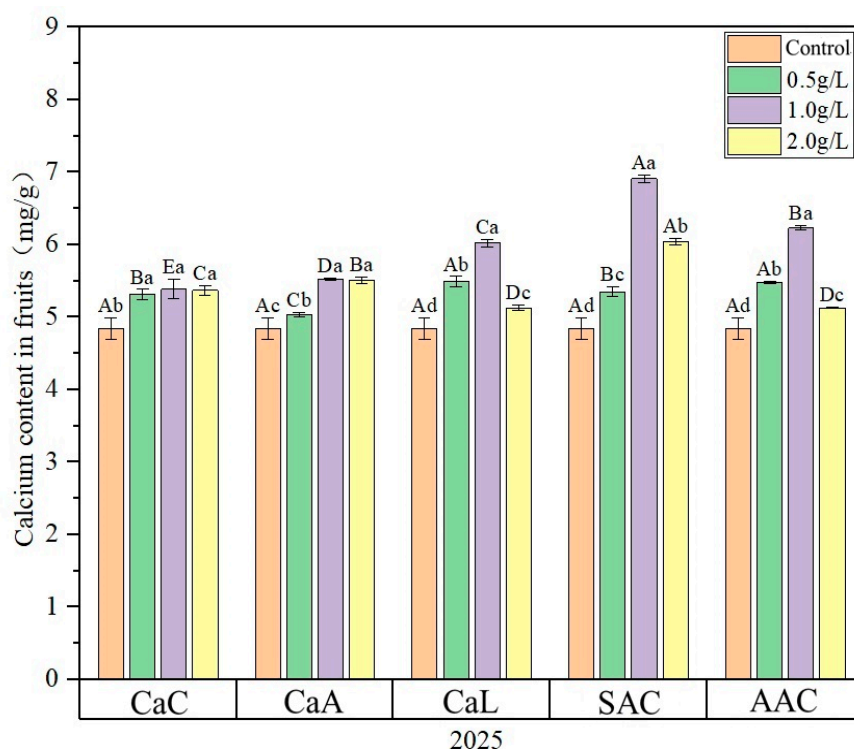

**Figure S10.** Effects of spraying different forms of calcium fertilizers on the calcium content in blue honeysuckle fruits in 2025. In the figure, the control represents spraying with water; CaC represents calcium chloride; CaA represents calcium acetate; CaL represents calcium lactate; SAC represents sugar alcohol calcium; AAC represents amino acid calcium. Data are presented as mean  $\pm$  standard deviation. Different lowercase letters indicate significant differences among different concentrations of the same calcium fertilizer treatment; different uppercase letters indicate significant differences among different calcium fertilizer treatments at the same concentration ( $P < 0.05$ ).

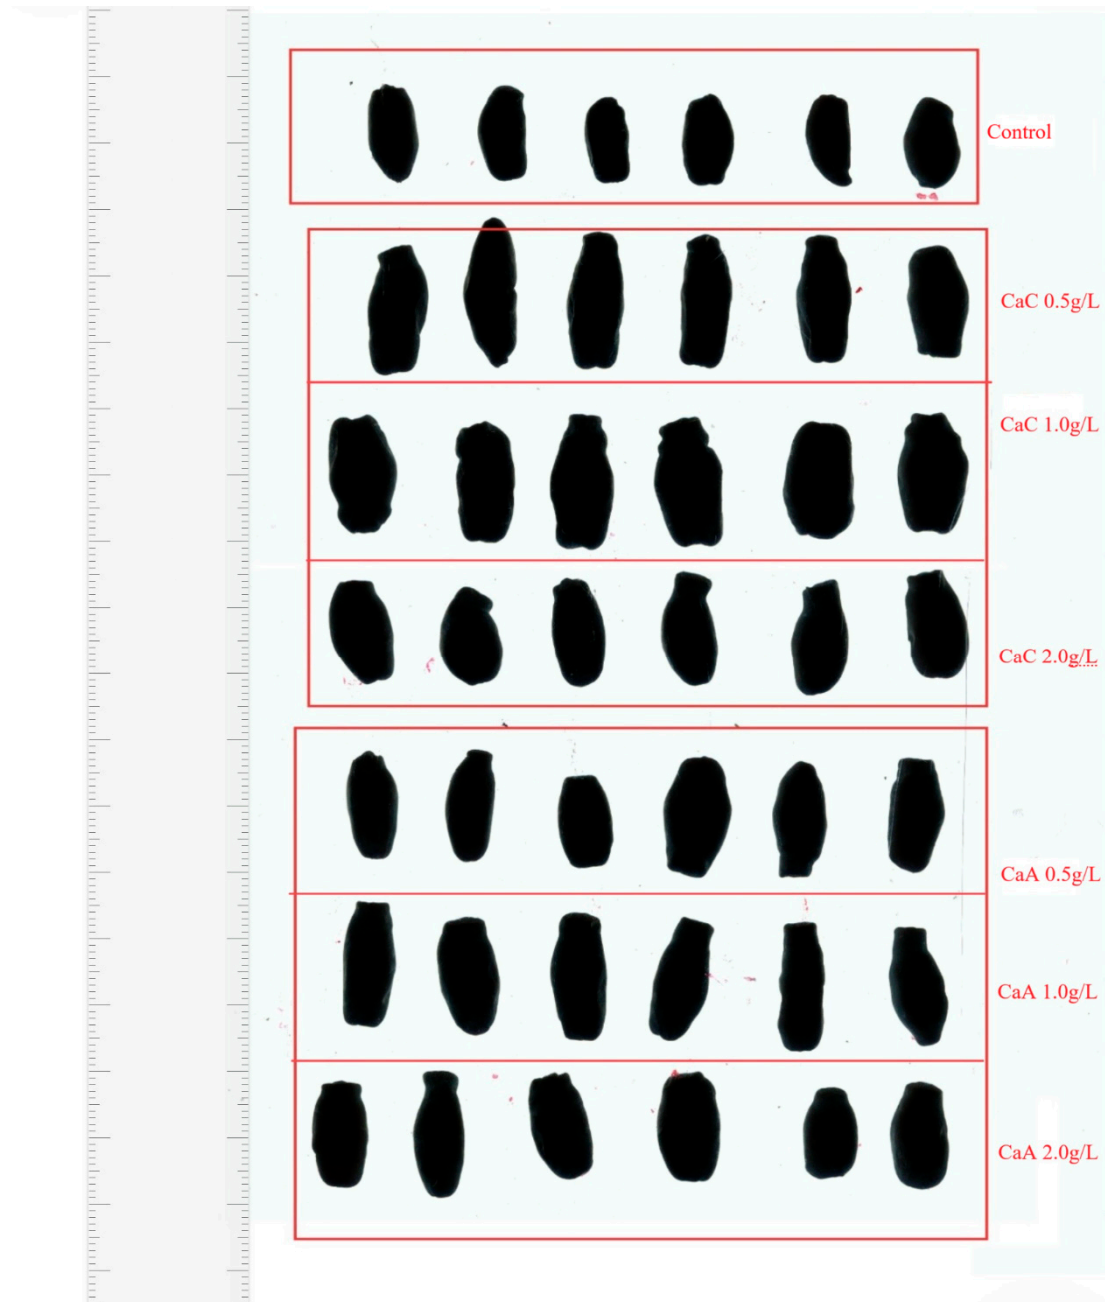

**Figure S11.** Blue honeysuckle shape diagram. In the figure, the control represents spraying with water; CaC represents calcium chloride; CaA represents calcium acetate. Fruit samples were scanned using an Epson Expression 12000XL scanner and analyzed with WinRHIZO Pro 2005 software (Regent Instruments Inc., Quebec, Canada).

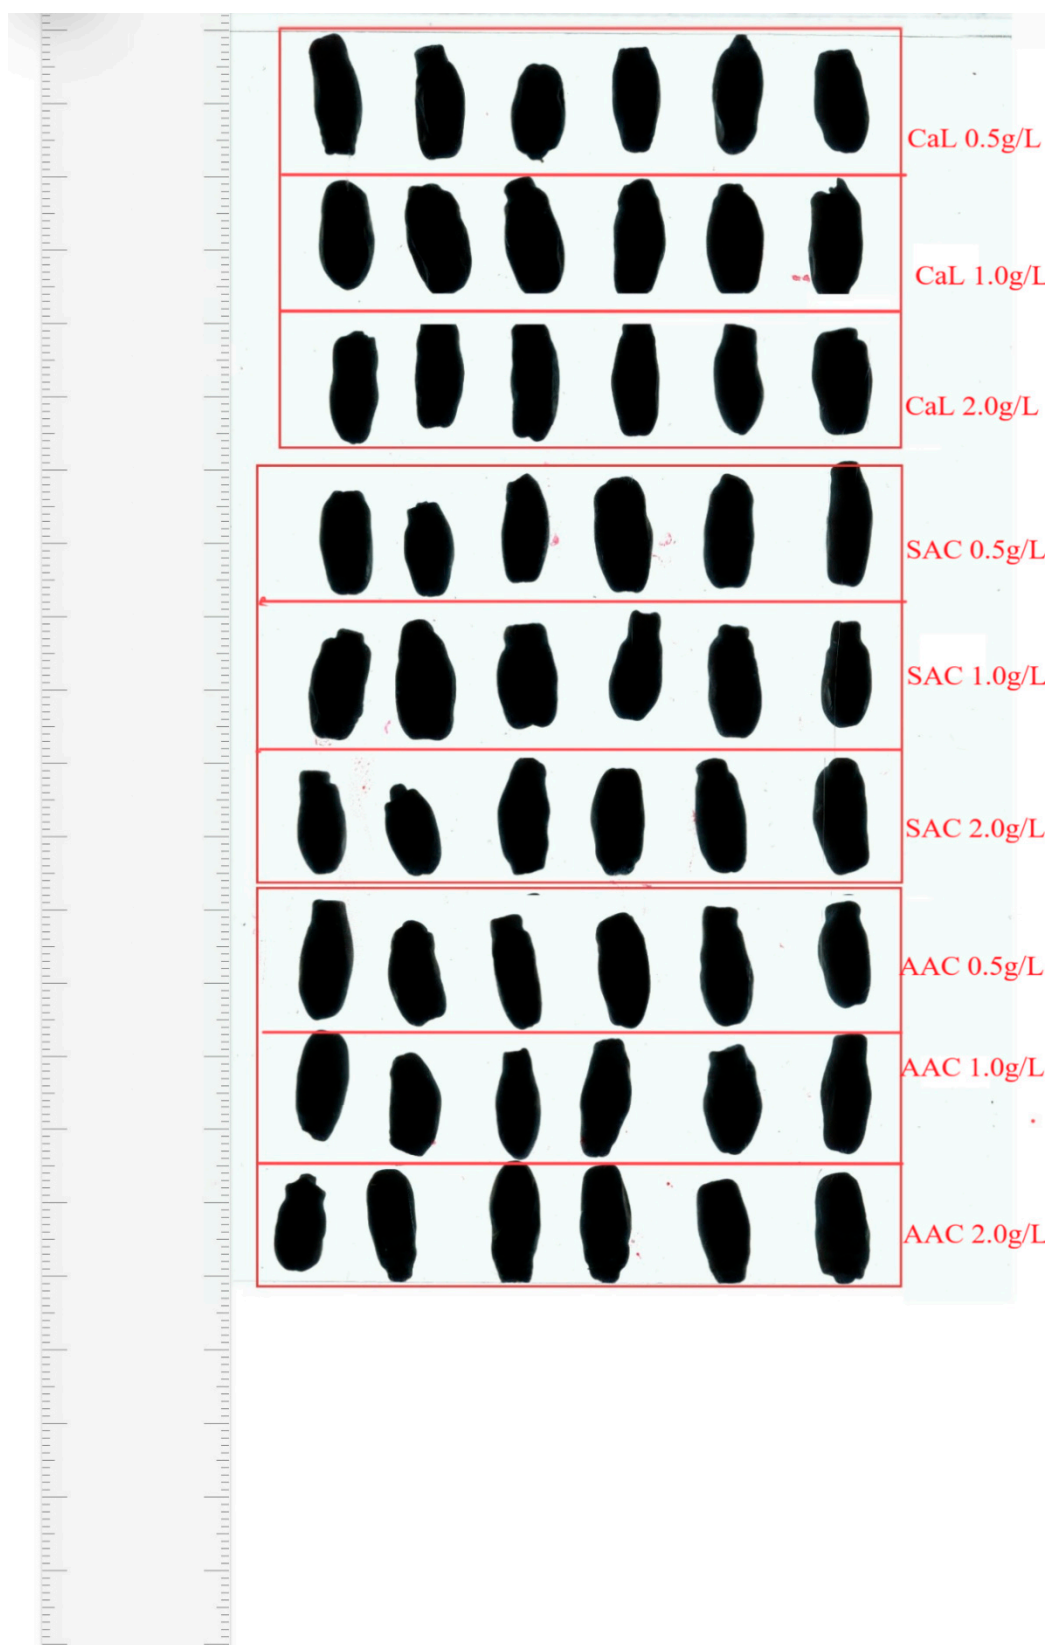

**Figure S12.** Blue honeysuckle shape diagram (continued). In the figure, the control represents spraying with water; CaC represents calcium chloride; CaA represents calcium acetate. Fruit samples were scanned using an Epson Expression 12000XL scanner and analyzed with WinRHIZO Pro 2005 software (Regent Instruments Inc., Quebec, Canada).
